# Supplementary material
Source: MDPI journal article supplement (https://www.mdpi.com/2071-1050/11/13/3640)
Supplement: s1 [file s1]

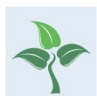

## Integration of ICT in Supply Chains Survey

The goal of this survey is to collect true and accurate information on the integration of ICT in the supply chain in national companies, with the sole purpose of measuring their performance and promoting their improvement. Therefore, we suggest that you answer with the greatest possible objectivity.

### General Data

Please fill in the following spaces with an X as appropriate.

|                                                                                                                                                                                                                                                                                                                                                                                                                                                                                                                                                                                                                                                                                                                                                                             |
|-----------------------------------------------------------------------------------------------------------------------------------------------------------------------------------------------------------------------------------------------------------------------------------------------------------------------------------------------------------------------------------------------------------------------------------------------------------------------------------------------------------------------------------------------------------------------------------------------------------------------------------------------------------------------------------------------------------------------------------------------------------------------------|
| Location of the company:<br><input type="checkbox"/> Tijuana <input type="checkbox"/> Mexicali <input type="checkbox"/> Tecate <input type="checkbox"/> Ensenada                                                                                                                                                                                                                                                                                                                                                                                                                                                                                                                                                                                                            |
| Sector to which it belongs:<br><input type="checkbox"/> Food industry<br><input type="checkbox"/> Manufacture of clothing<br><input type="checkbox"/> Printing and related industries<br><input type="checkbox"/> Plastic and rubber industry<br><input type="checkbox"/> Manufacture of products based on non-metallic minerals<br><input type="checkbox"/> Manufacture of metallic products<br><input type="checkbox"/> Manufacture of computer equipment, communication, electronic components, and accessories<br><input type="checkbox"/> Manufacture of accessories, electrical appliances, and electrical power generation equipment<br><input type="checkbox"/> Manufacture of furniture and mattresses<br><input type="checkbox"/> Other industry (Specify): _____ |
| Company size by number of employees:<br><input type="checkbox"/> 11–30 <input type="checkbox"/> 31–50 <input type="checkbox"/> 51–100 <input type="checkbox"/> 101–250 <input type="checkbox"/> More than 251                                                                                                                                                                                                                                                                                                                                                                                                                                                                                                                                                               |
| Hierarchical Position in the Company:<br><input type="checkbox"/> Manager <input type="checkbox"/> Supervisor <input type="checkbox"/> Operator                                                                                                                                                                                                                                                                                                                                                                                                                                                                                                                                                                                                                             |
| Years in the position:<br><input type="checkbox"/> less than 2 years <input type="checkbox"/> 2–5 years <input type="checkbox"/> 5–10 years <input type="checkbox"/> more than 10 years                                                                                                                                                                                                                                                                                                                                                                                                                                                                                                                                                                                     |
| Gender of the respondent:<br><input type="checkbox"/> Female <input type="checkbox"/> Male                                                                                                                                                                                                                                                                                                                                                                                                                                                                                                                                                                                                                                                                                  |

Success factors. Please mark with an X the degree of integration, according to what you assign in the elements of each of the following sections considering the following scale:

| Scale | Degree of integration |
|-------|-----------------------|
| 1     | Null                  |
| 2     | Mínimum               |
| 3     | Regular               |
| 4     | Sufficient            |
| 5     | High                  |

1. **Planning activities.** Please answer the elements according to the level of perception of the scale of importance mentioned above.

|                                                                                                     |                                                                                                                              | Degree of integration |          |          |          |          |
|-----------------------------------------------------------------------------------------------------|------------------------------------------------------------------------------------------------------------------------------|-----------------------|----------|----------|----------|----------|
| <b>A. To what extent do you consider that management integrates ICT ...</b>                         |                                                                                                                              | <b>1</b>              | <b>2</b> | <b>3</b> | <b>4</b> | <b>5</b> |
| 1                                                                                                   | At regular meetings.                                                                                                         |                       |          |          |          |          |
| 2                                                                                                   | In the activities of the company.                                                                                            |                       |          |          |          |          |
| 3                                                                                                   | In the necessary changes in collaboration within the company.                                                                |                       |          |          |          |          |
| 4                                                                                                   | In business processes.                                                                                                       |                       |          |          |          |          |
| 5                                                                                                   | In decision-making.                                                                                                          |                       |          |          |          |          |
| 6                                                                                                   | In the Investment of new products.                                                                                           |                       |          |          |          |          |
| <b>B. To what extent is the availability of access to information perceived?</b>                    |                                                                                                                              | <b>1</b>              | <b>2</b> | <b>3</b> | <b>4</b> | <b>5</b> |
| 7                                                                                                   | With enough computer equipment in your organization.                                                                         |                       |          |          |          |          |
| 8                                                                                                   | With enough ICT professionals in your organization.                                                                          |                       |          |          |          |          |
| 9                                                                                                   | With the knowledge necessary for the use of ICT.                                                                             |                       |          |          |          |          |
| 10                                                                                                  | With a person (or group) of developers available to give support in the software.                                            |                       |          |          |          |          |
| 11                                                                                                  | With retrieving information about suppliers, customers, and competitors.                                                     |                       |          |          |          |          |
| 12                                                                                                  | With gathering and processing the data to meet the client's needs.                                                           |                       |          |          |          |          |
| <b>C. Indicate the degree of integration of ICT in periodic training to ...</b>                     |                                                                                                                              | <b>1</b>              | <b>2</b> | <b>3</b> | <b>4</b> | <b>5</b> |
| 13                                                                                                  | The users of Information Technology in the changes, skills, and importance of the accuracy of the data and responsibilities. |                       |          |          |          |          |
| 14                                                                                                  | Users of the information system with regular assistance to a formal training program that meets the required requirements.   |                       |          |          |          |          |
| 15                                                                                                  | The users of the information system with training teams for each job.                                                        |                       |          |          |          |          |
| <b>D. Indicate the perception of the degree of integration of ICT in software configuration ...</b> |                                                                                                                              | <b>1</b>              | <b>2</b> | <b>3</b> | <b>4</b> | <b>5</b> |
| 16                                                                                                  | That satisfies all the needs in the organization of processes.                                                               |                       |          |          |          |          |
| 17                                                                                                  | That adapts to the modifications required by the processes of the organization.                                              |                       |          |          |          |          |
| 18                                                                                                  | That is compatible with the business practices of the organization (data).                                                   |                       |          |          |          |          |

2. **Implementation activities.** Please answer the elements according to the level of perception of the scale of importance mentioned.

|                                                                                                 |                                                     | Degree of integration |          |          |          |          |
|-------------------------------------------------------------------------------------------------|-----------------------------------------------------|-----------------------|----------|----------|----------|----------|
| <b>E. Indicate the perception of the degree of integration of ICT in the improvement of ...</b> |                                                     | <b>1</b>              | <b>2</b> | <b>3</b> | <b>4</b> | <b>5</b> |
| 19                                                                                              | The strategic management of the production process. |                       |          |          |          |          |
| 20                                                                                              | The relationship with suppliers.                    |                       |          |          |          |          |
| 21                                                                                              | The logistic processes.                             |                       |          |          |          |          |
| 22                                                                                              | Delays in the distribution process.                 |                       |          |          |          |          |
| 23                                                                                              | Production planning.                                |                       |          |          |          |          |
| 24                                                                                              | Maintenance planning.                               |                       |          |          |          |          |
| <b>F. Indicate the degree of integration of ICT in ...</b>                                      |                                                     | <b>1</b>              | <b>2</b> | <b>3</b> | <b>4</b> | <b>5</b> |
| 25                                                                                              | Effectiveness in operations.                        |                       |          |          |          |          |
| 26                                                                                              | Productivity of operations.                         |                       |          |          |          |          |
| 27                                                                                              | Performing tasks in the work area.                  |                       |          |          |          |          |

| <b>G. Indicate the degree of integration of ICT in the ease of use of IT (EDI, Internet, e-mail, B2B) on ...</b> |                                                    | 1 | 2 | 3 | 4 | 5 |
|------------------------------------------------------------------------------------------------------------------|----------------------------------------------------|---|---|---|---|---|
| 28                                                                                                               | Production processes.                              |   |   |   |   |   |
| 29                                                                                                               | Maintenance management.                            |   |   |   |   |   |
| 30                                                                                                               | Meet customer requirements.                        |   |   |   |   |   |
| 31                                                                                                               | Improve customer service.                          |   |   |   |   |   |
| 32                                                                                                               | Improve decision making in production.             |   |   |   |   |   |
| <b>H. Indicate the degree of integration of ICT in ...</b>                                                       |                                                    | 1 | 2 | 3 | 4 | 5 |
| 33                                                                                                               | Inventory management with suppliers and customers. |   |   |   |   |   |
| 34                                                                                                               | Effectiveness of operations.                       |   |   |   |   |   |
| 35                                                                                                               | Management of material requirements planning.      |   |   |   |   |   |
| 36                                                                                                               | Production control management.                     |   |   |   |   |   |
| 37                                                                                                               | Coordination of suppliers with production lines.   |   |   |   |   |   |
| 38                                                                                                               | Introduce new products and services.               |   |   |   |   |   |
| 39                                                                                                               | Respond to market changes.                         |   |   |   |   |   |

3. **Control activities.** Please answer the elements according to the level of perception of the scale of importance mentioned.

|                                                                                                |                                                                                                                 | <b>Degree of integration</b> |   |   |   |   |
|------------------------------------------------------------------------------------------------|-----------------------------------------------------------------------------------------------------------------|------------------------------|---|---|---|---|
| <b>I. Indicate the degree of integration of ICT in the company's capacity to ...</b>           |                                                                                                                 | 1                            | 2 | 3 | 4 | 5 |
| 40                                                                                             | Search and renew the most modern information technology.                                                        |                              |   |   |   |   |
| 41                                                                                             | Effectively use data exchange.                                                                                  |                              |   |   |   |   |
| 42                                                                                             | Maintain the information system.                                                                                |                              |   |   |   |   |
| 43                                                                                             | Maintain a solid data network with suppliers and customers to monitor and evaluate the exchange of information. |                              |   |   |   |   |
| <b>J. Indicate the degree of integration of ICT in the data of the organization with ...</b>   |                                                                                                                 | 1                            | 2 | 3 | 4 | 5 |
| 44                                                                                             | Suppliers.                                                                                                      |                              |   |   |   |   |
| 45                                                                                             | Commercial customers.                                                                                           |                              |   |   |   |   |
| 46                                                                                             | With suppliers and customers in product development processes.                                                  |                              |   |   |   |   |
| 47                                                                                             | Managing activities and relationships with suppliers.                                                           |                              |   |   |   |   |
| 48                                                                                             | Managing customer demand.                                                                                       |                              |   |   |   |   |
| 49                                                                                             | Inventory management materials.                                                                                 |                              |   |   |   |   |
| 50                                                                                             | Order management and delivery compliance.                                                                       |                              |   |   |   |   |
| 51                                                                                             | Tracking customer order.                                                                                        |                              |   |   |   |   |
| <b>K. Indicate the degree of integration of ICT in the documentation and evaluation of ...</b> |                                                                                                                 | 1                            | 2 | 3 | 4 | 5 |
| 52                                                                                             | Purchasing and sales systems.                                                                                   |                              |   |   |   |   |
| 53                                                                                             | Planning and programming of the activities of the organization.                                                 |                              |   |   |   |   |
| 54                                                                                             | Of the software used in the information system.                                                                 |                              |   |   |   |   |
| 55                                                                                             | Warehouse management systems.                                                                                   |                              |   |   |   |   |
| <b>L. Indicate the degree of integration of ICT in the information advantage in ...</b>        |                                                                                                                 | 1                            | 2 | 3 | 4 | 5 |
| 56                                                                                             | The various internal information systems.                                                                       |                              |   |   |   |   |
| 57                                                                                             | Internet capability of the organization.                                                                        |                              |   |   |   |   |

|    |                                       |  |  |  |  |  |
|----|---------------------------------------|--|--|--|--|--|
| 58 | Provide high quality services.        |  |  |  |  |  |
| 59 | The internal computer network system. |  |  |  |  |  |
| 60 | The trends of the electronic market.  |  |  |  |  |  |

4. **Benefits for the client.** Please answer the elements according to the level of perception of the scale of degree of benefit 1-5 (where 1 = null 5 = high).

|                                                                                             |                                                                | Degree of benefit |   |   |   |   |
|---------------------------------------------------------------------------------------------|----------------------------------------------------------------|-------------------|---|---|---|---|
| M. Indicate the degree of benefit when integrating ICT in ...                               |                                                                | 1                 | 2 | 3 | 4 | 5 |
| 61                                                                                          | Flexibility of the systems to meet customer needs.             |                   |   |   |   |   |
| 62                                                                                          | Strengthen the relationship with suppliers.                    |                   |   |   |   |   |
| 63                                                                                          | Cost competitiveness.                                          |                   |   |   |   |   |
| 64                                                                                          | Shorter order cycles.                                          |                   |   |   |   |   |
| 65                                                                                          | Customer response flexibility.                                 |                   |   |   |   |   |
| N. Indicate degree of benefit when integrating ICT in obtaining market information with ... |                                                                | 1                 | 2 | 3 | 4 | 5 |
| 66                                                                                          | Suppliers                                                      |                   |   |   |   |   |
| 67                                                                                          | Competitors.                                                   |                   |   |   |   |   |
| 68                                                                                          | Provide high quality services.                                 |                   |   |   |   |   |
| 69                                                                                          | Meet customer needs.                                           |                   |   |   |   |   |
| 70                                                                                          | Accuracy of the information with the client.                   |                   |   |   |   |   |
| 71                                                                                          | Information security.                                          |                   |   |   |   |   |
| 72                                                                                          | Reliable information (depending on capacity, trust, solvency). |                   |   |   |   |   |
| 73                                                                                          | Timely information (relevance, review).                        |                   |   |   |   |   |

5. **Benefits for the company.** Please answer the elements according to the level of perception of the benefit scale mentioned above.

|                                                                                            |                                                          | Degree of benefit |   |   |   |   |
|--------------------------------------------------------------------------------------------|----------------------------------------------------------|-------------------|---|---|---|---|
| O. Indicate the degree of benefit when integrating TIC in the delivery of merchandise ...  |                                                          | 1                 | 2 | 3 | 4 | 5 |
| 91                                                                                         | On time.                                                 |                   |   |   |   |   |
| 92                                                                                         | In quality                                               |                   |   |   |   |   |
| 93                                                                                         | In the amount.                                           |                   |   |   |   |   |
| 94                                                                                         | In the right product.                                    |                   |   |   |   |   |
| P. Indicate the degree of benefit when integrating ICT in the merchandise inventory in ... |                                                          | 1                 | 2 | 3 | 4 | 5 |
| 95                                                                                         | Stock rotation.                                          |                   |   |   |   |   |
| 96                                                                                         | Cycle time (from raw materials to delivery).             |                   |   |   |   |   |
| 97                                                                                         | Inventory control planning.                              |                   |   |   |   |   |
| 98                                                                                         | The planning of the process of acquisition of materials. |                   |   |   |   |   |
| 99                                                                                         | Periodic review of stock.                                |                   |   |   |   |   |
|                                                                                            |                                                          |                   |   |   |   |   |
|                                                                                            |                                                          |                   |   |   |   |   |

|                                                                                       |                                                        | Degree of benefit |   |   |   |   |
|---------------------------------------------------------------------------------------|--------------------------------------------------------|-------------------|---|---|---|---|
| Q. Indicate the degree of integration of ICT in the performance of the company in ... |                                                        | 1                 | 2 | 3 | 4 | 5 |
| 100                                                                                   | Improve customer delivery on time.                     |                   |   |   |   |   |
| 101                                                                                   | Increase the availability of raw materials on the web. |                   |   |   |   |   |
| 102                                                                                   | Increased productivity.                                |                   |   |   |   |   |
| 103                                                                                   | Reduce inventory costs.                                |                   |   |   |   |   |
| 104                                                                                   | Performance of our final products.                     |                   |   |   |   |   |
| 105                                                                                   | Speed of deliveries.                                   |                   |   |   |   |   |
| 106                                                                                   | Volume or flexible capacity.                           |                   |   |   |   |   |
| 107                                                                                   | Degree of variety of products.                         |                   |   |   |   |   |
| 108                                                                                   | Lower production costs                                 |                   |   |   |   |   |
| 109                                                                                   | Greater efficiency in planning.                        |                   |   |   |   |   |

6. **ICT tools.** In this section please mark with an X if you know the tool, if your answer is affirmative show the level of professional use within your company. (Assigning a scale of 1-5 where 1 = zero use of the tool and 5 = maximum use of the tool).

| ICT Tool |                                                                              | Do you know it? |    | Use grade level |   |   |   |   |
|----------|------------------------------------------------------------------------------|-----------------|----|-----------------|---|---|---|---|
|          |                                                                              | yes             | no | 1               | 2 | 3 | 4 | 5 |
| 1        | Internet connection.                                                         |                 |    |                 |   |   |   |   |
| 2        | Electronic Data Exchange (EDE).                                              |                 |    |                 |   |   |   |   |
| 3        | Email.                                                                       |                 |    |                 |   |   |   |   |
| 4        | Social Networks (Facebook, Website, B2B, Auctions, WhatsApp, YouTube)        |                 |    |                 |   |   |   |   |
| 5        | Internet domain.                                                             |                 |    |                 |   |   |   |   |
| 6        | Web page.                                                                    |                 |    |                 |   |   |   |   |
| 7        | Electronic sale and purchase.                                                |                 |    |                 |   |   |   |   |
| 8        | Extranet (information exchange)                                              |                 |    |                 |   |   |   |   |
| 9        | Sourcing (Search for suppliers)                                              |                 |    |                 |   |   |   |   |
| 10       | Business Management Software (BMS, Microchip, ERP, MRP, CRP, Oracle, others) |                 |    |                 |   |   |   |   |

**Thank you for answering this questionnaire!**

**The recorded information is completely confidential and anonymous, if you have any doubt, do not hesitate to ask the interviewer.**
